# Supplementary figures and images for: Stat3 Upregulates Leucine-Rich Repeat-Containing G Protein-Coupled Receptor 4 Expression in Osteosarcoma Cells
Source: Hindawi journal article supplement (doi:10.1155/2013/310691), 2013-01-01

Supplementary Figure 1

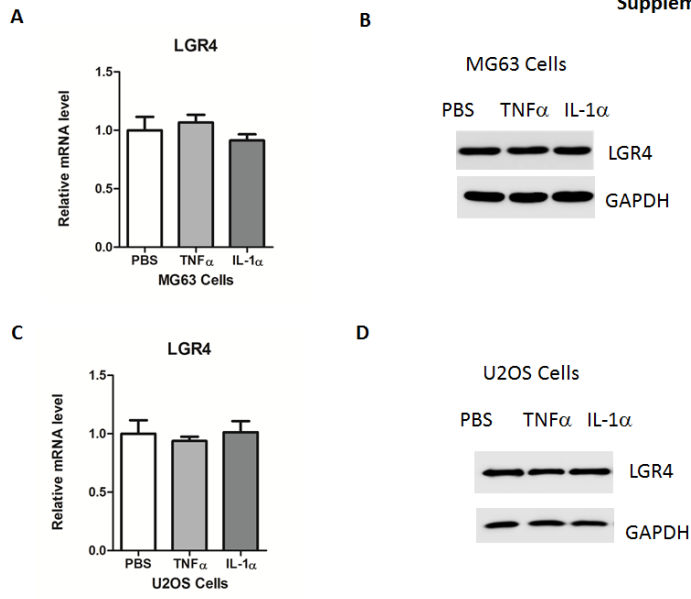

Supplementary Figure 2

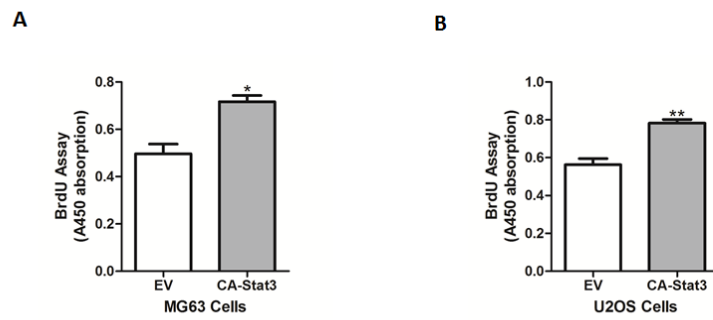

Supplementary Figure 3

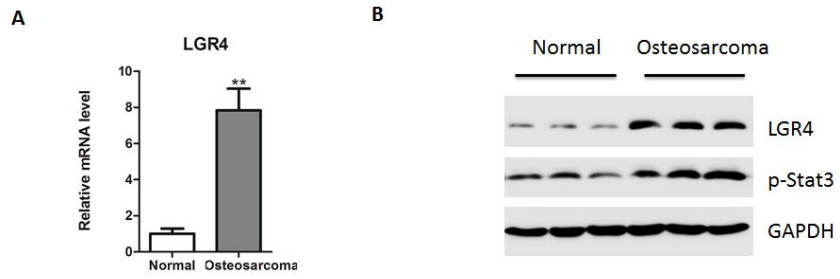

Supplementary Figure 4

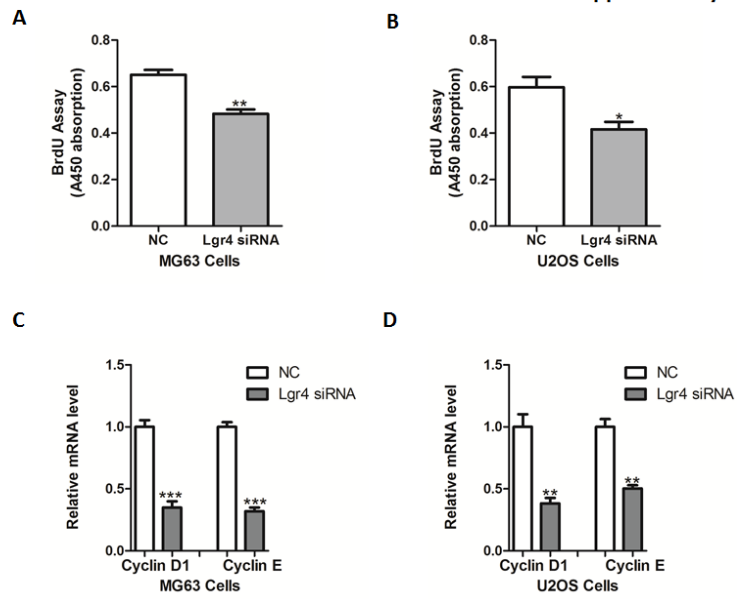

Supplement: f1 [file 310691.f1.pdf]
